# Supplementary material for: Single Amino Acid Mutations Affect Zika Virus Replication In Vitro and Virulence In Vivo
Source: PubMed Central journal article supplement (PMC7697975; doi:10.3390/v12111295), 2020-11-12
Supplement: viruses-12-01295-s001.pdf [file viruses-12-01295-s001.pdf]

**Suppl Table 1. Primers used for SDM**

| <b>Mutant</b> | <b>Forward</b>             | <b>Reverse</b>              |
|---------------|----------------------------|-----------------------------|
| 123           | GCTATGGCAGTGGAGGTCACTAG    | TGTGGTCAGCAGGAGGCC          |
| 894           | ATGTGGAGAGCTCCACAGAGATTG   | GGGGTTTTTTTACAGATCC         |
| 1404          | CTGGGCCCATAGCCGCGGTCTG     | CCATCTCTATATCTGCCTTGGCGAACC |
| 2074          | CAACACCATACTGGAAGACAGTG    | TTGGTCGTGCCATCAAAG          |
| 2086          | GTGGACCAGATACGGAGAGAAAAGAG | ACCTCTGCCGGCACACTG          |

**Suppl Table 2. Summary of Sanger sequencing data for detection of reversions of mutant to wild type amino acid.**

| <b>Sequence data: Female mice</b>                                 |                   |                                                  |                                   |
|-------------------------------------------------------------------|-------------------|--------------------------------------------------|-----------------------------------|
| <b>Mutant</b>                                                     | <b>Reversions</b> | <b>Sample Types Tested</b>                       | <b>Reverted Type*</b>             |
| 123                                                               | 0/5               | 1 Placenta, 3 Spleen, 1 Blood                    | NA                                |
| 894                                                               | 0/5               | 3 Placenta, 2 Blood                              | NA                                |
| 1404                                                              | 0/5               | 1 Spleen, 4 Blood                                | NA                                |
| 2074                                                              | 1/5               | 3 Placenta, 2 Blood                              | Blood (1-T)                       |
| 2086                                                              | 4/6               | 3 Placenta, 1 Spleen, 2 Blood                    | Placenta (3-P) , Spleen (1-P)     |
|                                                                   |                   |                                                  |                                   |
| <b>Sequence data: Male mice</b>                                   |                   |                                                  |                                   |
| <b>Mutant</b>                                                     | <b>Reversions</b> | <b>Sample Types</b>                              | <b>Reverted Type*</b>             |
| 123                                                               | 0/12              | 3 Brain, 3 Spleen, 3 Testes, 3 Blood             | NA                                |
| 894                                                               | 0/11              | 3 Brain, 3 Spleen, 3 Testes, 3 Blood             | NA                                |
| 1404                                                              | 0/12              | 3 Brain, 3 Spleen, 3 Testes, 3 Blood             | NA                                |
| 2074                                                              | 0/12              | 3 Brain, 3 Spleen, 3 Testes, 3 Blood             | NA                                |
| 2086                                                              | 1/12              | 3 Brain, 3 Spleen, 3 Testes, 3 Blood             | Spleen (1-T)                      |
|                                                                   |                   |                                                  |                                   |
| <b>All Sequencing Data: 85 samples total (59 male, 26 female)</b> |                   |                                                  |                                   |
| <b>Mutant</b>                                                     | <b>Reversions</b> | <b>Sample Types</b>                              | <b>Reverted Type*</b>             |
| 123                                                               | 0/17              | 3 Brain, 3 Spleen, 3 Testes, 1 Placenta, 3 Blood | NA                                |
| 894                                                               | 0/16              | 3 Brain, 3 Spleen, 3 Testes, 3 Placenta, 5 Blood | NA                                |
| 1404                                                              | 0/17              | 3 Brain, 4 Spleen, 3 Testes, 7 Blood             | NA                                |
| 2074                                                              | 1/17              | 3 Brain, 3 Spleen, 3 Testes, 3 Placenta, 5 Blood | Blood (1-T)                       |
| 2086                                                              | 5/18              | 3 Brain, 4 Spleen, 3 Testes, 3 Placenta, 5 Blood | Placenta (3-P), Spleen (1-P, 1-T) |

\* P = partial reversion; two peaks at mutation site; T = total reversion

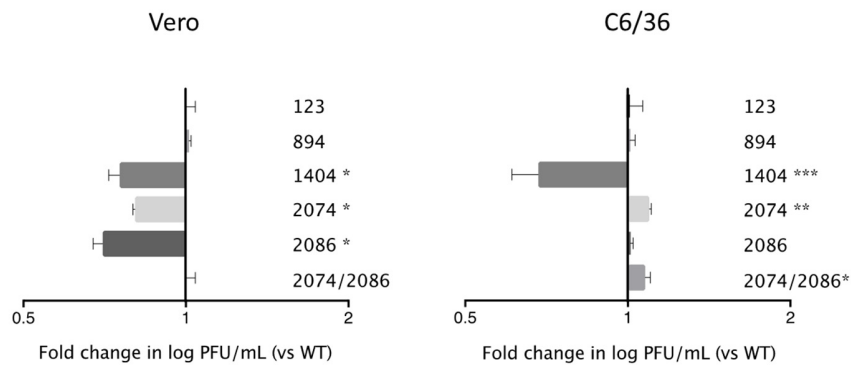

**Suppl Fig. 1. Comparison of Host Viral Replication via Plaque Assay.** (A) Synthetic mutant viral strains (123, 894, 1404, 2074, 2086, 2074/2086) are compared to the WT infectious clone in Vero (A, C) and C6/36 (B, D) cells provide evidence of differences in growth rates based on each point mutation. Significant differences are indicated by asterisks (\* =  $p < 0.05$ ; \*\*\* =  $p < 0.001$ ).

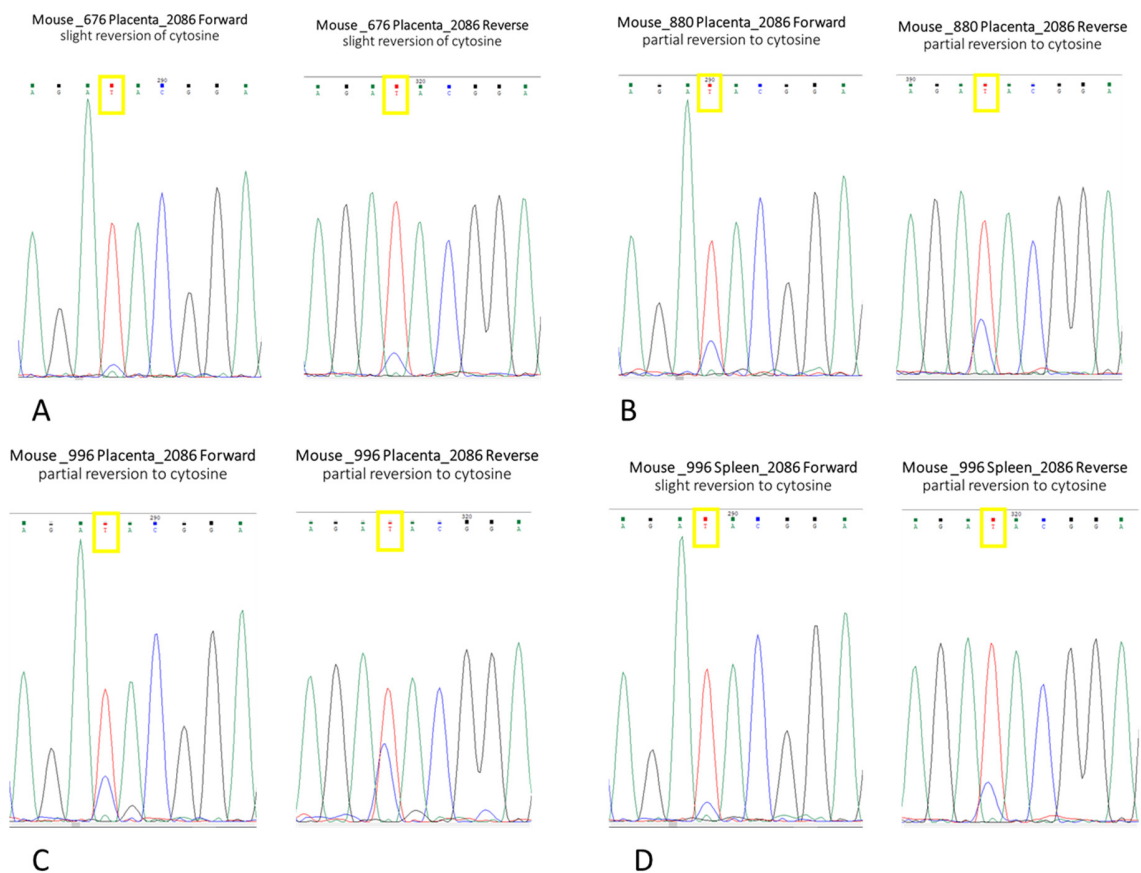

**Suppl Fig. 2. Sanger sequence data showing partial reversions detected in mutant 2086 samples.** For each set of traces, the mutated nucleotide is highlighted in a yellow box; mouse number, mutant number and tissue type is above sequencing traces. First set of peaks shown are sequencing data generated with the forward primer and second set is reverse complement data from the reverse primer. A) Mouse 676, mutant 2086, placenta; B) Mouse 880, mutant 2086, placenta; C) Mouse 996, mutant 2086, placenta; D) Mouse 996, mutant 2086, spleen.
